# Supplementary material for: Does Physical Exercise Always Improve Bone Quality in Rats?
Source: PubMed Central journal article supplement (PMC7598192; doi:10.3390/life10100217), 2020-09-23
Supplement: life-10-00217-s001.pdf [file life-10-00217-s001.pdf]

Supplementary Materials

**Table S1.** Effects of physical exercise for treadmill, wheel activities, swimming, resistance exercise and vibrating platform on bone parameters in healthy (male and female) and osteopenic rats.

| Exercise Modalities                  | Sex Or Bone Status     | BMD                                                                                                                                                                                                                                | Micro-Architecture                                                                                                                                            | Mechanical Properties                                                                                                                                          | Osteoblast / Osteocyte Lineage                                                                          | Osteoclast Activity                                                                 |
|--------------------------------------|------------------------|------------------------------------------------------------------------------------------------------------------------------------------------------------------------------------------------------------------------------------|---------------------------------------------------------------------------------------------------------------------------------------------------------------|----------------------------------------------------------------------------------------------------------------------------------------------------------------|---------------------------------------------------------------------------------------------------------|-------------------------------------------------------------------------------------|
|                                      |                        | 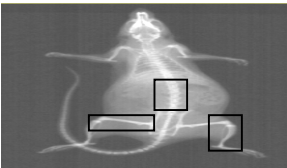                                                                                                                                                  |                                                                             |                                                                             |                      |  |
| <b>Treadmill running and walking</b> |                        |                                                                                                                                                                                                                                    |                                                                                                                                                               |                                                                                                                                                                |                                                                                                         |                                                                                     |
| <b>Positive effects</b>              |                        |                                                                                                                                                                                                                                    |                                                                                                                                                               |                                                                                                                                                                |                                                                                                         |                                                                                     |
|                                      | <b>Healthy males</b>   | (Boudenot et al., 2015; Chen et al., 2004; Davicco et al., 1999; Hagihara et al., 2005; Horcajada et al., 1997; Järvinen et al., 2003; Joo et al., 2003; Kannus et al., 1994, 1996; Leppänen et al., 2008; Pajamäki et al., 2003a) | (Huang et al., 2002; Joo et al., 2003; Vicente et al., 2013; Yao et al., 2004)                                                                                | (Chen et al., 2004; Horcajada-Molteni et al., 1999b; Huang et al., 2008; Järvinen et al., 2003; Joo et al., 2003; Pajamäki et al., 2003b; Takeda et al., 2012) | (Boudenot et al., 2014; David et al., 2007; Iijima et al., 2015; Li et al., 1991; Vicente et al., 2013) | (Bourrin et al., 1995a, 1995b; Swift et al., 2012a; Vicente et al., 2013)           |
|                                      | <b>Healthy females</b> | (Hagihara et al., 2009; Hamann et al., 2012a; Iwamoto et al., 2004; Leppänen et al., 2008; Markiewicz-Górka et al., 2019; Omi et al., 1998; van der Wiel et al., 1995; Yeh et al., 1993b, 1993c, 1993a)                            | (Fang et al., 2019; Iwamoto et al., 1999; Leppänen et al., 2008; Markiewicz-Górka et al., 2019; Swift et al., 2012b; Vicente et al., 2013; Yeh et al., 1993d) | (Fang et al., 2019; Järvinen et al., 1998; Leppänen et al., 2008; Peng et al., 1994)                                                                           | (Fang et al., 2019)                                                                                     | (Fang et al., 2019; Vicente et al., 2013)                                           |
|                                      | <b>Osteopenic</b>      | (Nicolas Bonnet et al., 2007; Chang et al., 2010a; Chen et al., 2011a; Fuchs et al.,                                                                                                                                               | (N. Bonnet et al., 2007; Nicolas Bonnet et al., 2007; Bourrin et                                                                                              | (N. Bonnet et al., 2007; Nicolas Bonnet et al., 2007; Bu et al., 2012;                                                                                         | Barengolts et al. 1994; N. Bonnet et al. 2007; Liu et al. 2012; Ocarino et al. 2007;                    | (N. Bonnet et al., 2007; Yeh et al., 1993d)                                         |

|                            |                                                                                                                                                                                                                                         |                                                                                              |                                                                                                                  |                                                                    |   |
|----------------------------|-----------------------------------------------------------------------------------------------------------------------------------------------------------------------------------------------------------------------------------------|----------------------------------------------------------------------------------------------|------------------------------------------------------------------------------------------------------------------|--------------------------------------------------------------------|---|
|                            | 2007a; Iwamoto et al., 1998; Kannus et al., 1994; Lespessailles et al., 2009; Nakajima et al., 2001; Tamaki et al., 1998a; Yeh et al., 1993d; Yuasa et al., 2020)                                                                       | al., 1995a; Chen et al., 2011b; Fuchs et al., 2007a; Li et al., 2014a; Ocarino et al., 2010) | Fuchs et al., 2007b; Järvinen et al., 2003; Lespessailles et al., 2009; Peng et al., 1997; Simões et al., 2008a) | Toumi et al. 2015; ( Tamaki et al. 1998a; Yeh, Liu, et Aloia 1993) |   |
| <b>No effect</b>           |                                                                                                                                                                                                                                         |                                                                                              |                                                                                                                  |                                                                    |   |
| <b>Healthy males</b>       | (Boudenot et al., 2012; Horcajada-Molteni et al., 1999a, 1999b; Huang et al., 2002; Iwamoto et al., 2004; Maurel et al., 2013; Notomi et al., 2000; Sipos et al., 2008a; Thomsen et al., 2008; Yao et al., 2004; Yingling et al., 2001) | (Leppänen et al., 2008; Maurel et al., 2011; Notomi et al., 2000; Reed et al., 2002)         | (Notomi et al., 2000; Pajamäki et al., 2003c)                                                                    | ∅                                                                  | ∅ |
| <b>Healthy females</b>     | (Chang et al., 2010b; Mathey et al., 2002; Oxlund et al., 1998; Tromp et al., 2006; Warner et al., 2006; Yingling et al., 2001)                                                                                                         | (Hamann et al., 2012b; Iwamoto et al., 1999; Tromp et al., 2006)                             | (Fang et al., 2019; Oxlund et al., 1998)                                                                         | (Swift et al., 2012a; Vicente et al., 2013)                        | ∅ |
| <b>Osteopenic</b>          | ∅                                                                                                                                                                                                                                       | ∅                                                                                            | (Nordsletten et al., 1994; Shimano and Volpon, 2009; Simões et al., 2008b)                                       | ∅                                                                  | ∅ |
| <b>Detrimental effects</b> |                                                                                                                                                                                                                                         |                                                                                              |                                                                                                                  |                                                                    |   |
| <b>Healthy males</b>       | (Bourrin et al., 1994)                                                                                                                                                                                                                  | (Bourrin et al., 1994; Maurel et al., 2013; Sipos et al., 2008a)                             | ∅                                                                                                                | (Bourrin et al., 1994; Horcajada-Molteni et al., 1999a)            | ∅ |
| <b>Healthy females</b>     | (Rico et al., 1999a, 1999b; Seco et al., 1998; Swift et al., 2012a)                                                                                                                                                                     | ∅                                                                                            | ∅                                                                                                                | ∅                                                                  | ∅ |
| <b>Osteopenic</b>          |                                                                                                                                                                                                                                         |                                                                                              |                                                                                                                  |                                                                    |   |
| <b>Wheel running</b>       |                                                                                                                                                                                                                                         |                                                                                              |                                                                                                                  |                                                                    |   |
| <b>Positive effects</b>    |                                                                                                                                                                                                                                         |                                                                                              |                                                                                                                  |                                                                    |   |

|                            |                                                                    |                                                |                                          |                                                                |                            |
|----------------------------|--------------------------------------------------------------------|------------------------------------------------|------------------------------------------|----------------------------------------------------------------|----------------------------|
| <b>Healthy males</b>       | (Holy and Zérath, 2000; Newhall et al., 1991; Shiga et al., 2003a) | (Bégot et al., 2011; Thomsen et al., 2008)     | (Shiga et al., 2003b)                    | ∅                                                              | ∅                          |
| <b>Healthy females</b>     | (Banu et al., 1999)                                                | (Banu et al., 1999; Saino et al., 2003)        | (Banu et al., 1999)                      | (Fonseca et al., 2011a)                                        | ∅                          |
| <b>Osteopenic</b>          | (Li et al., 2014b; Omi et al., 1994)                               | (Li et al., 2014a)                             | ∅                                        | (Fonseca et al., 2011b; Goulet et al., 2011; Li et al., 2014b) | (Lertsinthal et al., 2015) |
| <b>No effect</b>           |                                                                    |                                                |                                          |                                                                |                            |
| <b>Healthy males</b>       | (Sipos et al., 2008b)                                              | (Hydock et al., 2008; Sipos et al., 2008a)     | ∅                                        | ∅                                                              | ∅                          |
| <b>Healthy females</b>     | ∅                                                                  | (Hydock et al., 2008)                          | ∅                                        | ∅                                                              | ∅                          |
| <b>Osteopenic</b>          | (Bodnar et al., 2012a; Hertrampf et al., 2006)                     | (Bodnar et al., 2012b; Hertrampf et al., 2006) | ∅                                        | (Li et al., 2014a)                                             | ∅                          |
| <b>Detrimental effects</b> |                                                                    |                                                |                                          |                                                                |                            |
| <b>Healthy males</b>       | ∅                                                                  | ∅                                              | ∅                                        | (Sipos et al., 2008b)                                          | (Sipos et al., 2008b)      |
| <b>Healthy females</b>     | ∅                                                                  | ∅                                              | ∅                                        | ∅                                                              | ∅                          |
| <b>Osteopenic</b>          | ∅                                                                  | ∅                                              | ∅                                        | ∅                                                              | ∅                          |
| <b>Swimming</b>            |                                                                    |                                                |                                          |                                                                |                            |
| <b>Positive effects</b>    |                                                                    |                                                |                                          |                                                                |                            |
| <b>Healthy males</b>       | (Kang et al., 2019)                                                | (Kang et al., 2019)                            | (Huang et al., 2003)                     | ∅                                                              | ∅                          |
| <b>Healthy females</b>     | (Snyder et al., 1992; Swissa-Sivan et al., 1992, 1990)             | ∅                                              | (Simkin et al., 1989)                    | ∅                                                              | ∅                          |
| <b>Osteopenic</b>          | (Karatosun et al., 2006; Volpon et al., 2015)                      | (Volpon et al., 2015)                          | (Hart et al., 2001; Volpon et al., 2015) | ∅                                                              | ∅                          |
| <b>No effect</b>           |                                                                    |                                                |                                          |                                                                |                            |
| <b>Healthy males</b>       | (Huang et al., 2010, 2003)                                         | ∅                                              | (T. H. Huang et al. 2003)                | ∅                                                              | ∅                          |
| <b>Healthy females</b>     | ∅                                                                  | (Simkin et al., 1989)                          | ∅                                        | (Falcai et al., 2015)                                          | ∅                          |
| <b>Osteopenic</b>          | ∅                                                                  | ∅                                              | ∅                                        | ∅                                                              | ∅                          |
| <b>Detrimental effects</b> |                                                                    |                                                |                                          |                                                                |                            |

|                            |                        |                                                                                                                                                                                                        |                                                                |                                                                                                 |                                            |                                            |
|----------------------------|------------------------|--------------------------------------------------------------------------------------------------------------------------------------------------------------------------------------------------------|----------------------------------------------------------------|-------------------------------------------------------------------------------------------------|--------------------------------------------|--------------------------------------------|
|                            | <b>Healthy males</b>   | ∅                                                                                                                                                                                                      | (Huang et al., 2010)                                           | ∅                                                                                               | ∅                                          | ∅                                          |
|                            | <b>Healthy females</b> | ∅                                                                                                                                                                                                      | (Bourrin et al., 1992)                                         | ∅                                                                                               | (Bourrin et al., 1992)                     | ∅                                          |
|                            | <b>Osteopenic</b>      | ∅                                                                                                                                                                                                      | ∅                                                              | ∅                                                                                               | ∅                                          | ∅                                          |
| <b>Resistance training</b> |                        |                                                                                                                                                                                                        |                                                                |                                                                                                 |                                            |                                            |
| <b>Positive effects</b>    |                        |                                                                                                                                                                                                        |                                                                |                                                                                                 |                                            |                                            |
|                            | <b>Healthy males</b>   | (Cavalié et al., 2003; Notomi et al., 2001, 2000; Smith et al., 2008; Swift et al., 2010)                                                                                                              | (Ju et al., 2014; Notomi et al., 2001; Swift et al., 2010)     | (Notomi et al., 2001)                                                                           | ∅                                          | (Notomi et al., 2001)                      |
|                            | <b>Healthy females</b> | (Aikawa et al., 2019; Honda et al., 2008; Rosa et al., 2010; Umemura et al., 1995; Welch et al., 2008, 2004)                                                                                           | ∅                                                              | (Aikawa et al., 2019; Honda et al., 2008; Umemura et al., 2002, 1997; Welch et al., 2008, 2004) | ∅                                          | ∅                                          |
|                            | <b>Osteopenic</b>      | (Falcai et al., 2015; Honda et al., 2001, 2003; Ju et al., 2008, 2012, 2013, 2014; Notomi et al., 2001; Okubo et al., 2017; Swift et al., 2011a; Umemura et al., 1995, 2008b; Yanagihara et al., 2016) | (Notomi et al., 2014; Okubo et al., 2017; Swift et al., 2011a) | (Honda et al., 2003, 2001; Notomi et al., 2014)                                                 | (Falcai et al., 2015; Swift et al., 2011b) | (Falcai et al., 2015; Macias et al., 2011) |
| <b>No effect</b>           |                        |                                                                                                                                                                                                        |                                                                |                                                                                                 |                                            |                                            |
|                            | <b>Healthy males</b>   | (Notomi et al., 2001; Smith et al., 2008)                                                                                                                                                              | ∅                                                              | ∅                                                                                               | ∅                                          | ∅                                          |
|                            | <b>Healthy females</b> | (Umemura et al., 2008a)                                                                                                                                                                                | (Aikawa et al., 2019)                                          | (Lin et al., 2013; Nagasawa et al., 2008)                                                       | ∅                                          | ∅                                          |
|                            | <b>Osteopenic</b>      | ∅                                                                                                                                                                                                      | ∅                                                              | ∅                                                                                               | ∅                                          | ∅                                          |
| <b>Detrimental effects</b> |                        |                                                                                                                                                                                                        |                                                                |                                                                                                 |                                            |                                            |
|                            | <b>Healthy males</b>   | ∅                                                                                                                                                                                                      | ∅                                                              | ∅                                                                                               | ∅                                          | ∅                                          |
|                            | <b>Healthy females</b> | ∅                                                                                                                                                                                                      | ∅                                                              | ∅                                                                                               | ∅                                          | ∅                                          |
|                            | <b>Osteopenic</b>      | ∅                                                                                                                                                                                                      | ∅                                                              | ∅                                                                                               | ∅                                          | ∅                                          |

| <b>Vibrations</b>          |                                                                                |                                                                                                     |                                                                                |                                            |                       |
|----------------------------|--------------------------------------------------------------------------------|-----------------------------------------------------------------------------------------------------|--------------------------------------------------------------------------------|--------------------------------------------|-----------------------|
| <b>Positive effects</b>    | <b>BMD</b>                                                                     | <b>Micro-architecture</b>                                                                           | <b>Mechanical properties</b>                                                   | <b>Osteoblast / osteocyte lineage</b>      | <b>Osteoclast</b>     |
| <b>Healthy males</b>       | (Yang et al., 2009a)                                                           | (Gong et al., 2019; Ogawa et al., 2014; Pasqualini et al., 2013)                                    | (Gong et al., 2019; Yang et al., 2009a)                                        | ∅                                          | ∅                     |
| <b>Healthy females</b>     | (Maddalozzo et al., 2008)                                                      | ∅                                                                                                   | ∅                                                                              | ∅                                          | ∅                     |
| <b>Osteopenic</b>          | (Liang et al., 2014)                                                           | (Hatori et al., 2015)                                                                               | ∅                                                                              | (Falcai et al., 2015; Tezval et al., 2011) | ∅                     |
| <b>No effect</b>           | <b>BMD</b>                                                                     | <b>Micro-architecture</b>                                                                           | <b>Mechanical properties</b>                                                   | <b>Osteoblast / osteocyte lineage</b>      | <b>Osteoclast</b>     |
| <b>Healthy males</b>       | (Nowak et al., 2014; Yang et al., 2009b)                                       | (Pasqualini et al., 2013)                                                                           | (Yang et al., 2009b)                                                           | ∅                                          | ∅                     |
| <b>Healthy females</b>     | (Maddalozzo et al., 2008)                                                      | ∅                                                                                                   | ∅                                                                              | (Tezval et al., 2011)                      | ∅                     |
| <b>Osteopenic</b>          | (Camargos et al., 2015a; Hoffmann et al., 2016, 2017; Komrakova et al., 2016a) | (Camargos et al., 2015a; Hatori et al., 2015; Hoffmann et al., 2016, 2017; Komrakova et al., 2016a) | (Camargos et al., 2015b; Hoffmann et al., 2017, 2016; Komrakova et al., 2016b) | (Tezval et al., 2011)                      | ∅                     |
| <b>Detrimental effects</b> |                                                                                |                                                                                                     |                                                                                |                                            |                       |
| <b>Healthy males</b>       | ∅                                                                              | ∅                                                                                                   | ∅                                                                              | ∅                                          | ∅                     |
| <b>Healthy females</b>     | ∅                                                                              | ∅                                                                                                   | ∅                                                                              | ∅                                          | ∅                     |
| <b>Osteopenic</b>          | (Xie et al., 2016)                                                             | (Xie et al., 2016)                                                                                  | (Xie et al., 2016)                                                             | ∅                                          | (Falcai et al., 2015) |

**Positive effects:** means that bone parameters were increased compare to control, **No effect:** means that bone parameters did not differ from control, **Detrimental effects:** means that bone parameters were decreased compare to control, ∅: Means that no results were found in the reported literature.
